# Supplementary material for: Amino-group carrier-protein-mediated secondary metabolite biosynthesis in Streptomyces
Source: Springer Nature journal article supplement (doi:10.1038/nchembio.2181), 2016-09-26
Supplement: 41589_2016_BFnchembio2181_MOESM6_ESM.mol [file 41589_2016_BFnchembio2181_MOESM6_ESM.mol]

nchembio.2181-comp1.mol
  ChemDraw09071609572D

 13 12  0  0  1  0  0  0  0  0999 V2000
   -1.7862   -0.2062    0.0000 C   0  0  0  0  0  0  0  0  0  0  0  0
   -1.0717    0.2062    0.0000 C   0  0  0  0  0  0  0  0  0  0  0  0
   -0.3572   -0.2062    0.0000 C   0  0  0  0  0  0  0  0  0  0  0  0
    0.3572    0.2062    0.0000 C   0  0  0  0  0  0  0  0  0  0  0  0
    1.0717   -0.2062    0.0000 C   0  0  0  0  0  0  0  0  0  0  0  0
    1.7862    0.2062    0.0000 C   0  0  0  0  0  0  0  0  0  0  0  0
    1.0717   -1.0313    0.0000 N   0  0  0  0  0  0  0  0  0  0  0  0
   -1.0717    1.0313    0.0000 O   0  0  0  0  0  0  0  0  0  0  0  0
   -2.5006    0.2062    0.0000 C   0  0  0  0  0  0  0  0  0  0  0  0
   -2.5006    1.0313    0.0000 O   0  0  0  0  0  0  0  0  0  0  0  0
   -1.7862   -1.0312    0.0000 N   0  0  0  0  0  0  0  0  0  0  0  0
    2.5006   -0.2062    0.0000 O   0  0  0  0  0  0  0  0  0  0  0  0
    1.7862    1.0313    0.0000 O   0  0  0  0  0  0  0  0  0  0  0  0
  1  2  1  0      
  2  3  1  0      
  3  4  1  0      
  4  5  1  0      
  5  6  1  0      
  5  7  1  1      
  2  8  1  6      
  1  9  1  0      
  9 10  1  0      
  1 11  1  6      
  6 12  1  0      
  6 13  2  0      
M  END
